# Supplementary material for: Comparative Study of Marine Cave Communities in a Protected Area of the South-Eastern Aegean Sea, Greece
Source: MDPI journal article supplement (doi:10.3390/jmse10050660), 2022-05-13
Supplement: s1 [file s1]

**Table S1.** Summary table with the average percentage of coverage (%) of all sessile taxa and morpho-functional groups recorded at the ecological zones of the six studied caves. + Presence of non-pointed taxa identified within the quadrats, \* Protected species under the Bern and Barcelona Conventions (Annex II: List of endangered or threatened species), † Protected species under the Convention on International Trade in Endangered Species of Wild Fauna and Flora (CITES - Appendix II), ALO: Alona, GIOU: Giourious, OXO: Oxonisos, PAL: Palatia, PANT: Panteleimonas, TROU: Troulakas, CE: entrance zone, SD: semi-dark zone.

| Sessile taxa                                                            | ALO  |     | GIOU |      | OXO  |      | PAL  |      | PANT |      | TROU |      |
|-------------------------------------------------------------------------|------|-----|------|------|------|------|------|------|------|------|------|------|
|                                                                         | CE   | SD  | CE   | SD   | CE   | SD   | CE   | SD   | CE   | SD   | CE   | SD   |
| <b>Macroalgae</b>                                                       |      |     |      |      |      |      |      |      |      |      |      |      |
| <i>Amphiroa</i> sp.                                                     |      |     | 0.1  |      |      |      |      |      | 0.1  |      |      |      |
| Encrusting Rhodophyta                                                   | 8.2  |     | 10.4 | 14.3 | 4.8  | 3.8  | 10.1 | 1.1  | 4.5  | 7.7  | 13   | 0.7  |
| <i>Gelidium</i> sp.                                                     | +    |     |      |      |      |      |      |      |      |      |      |      |
| Green filamentous algae                                                 |      |     |      |      |      |      |      |      |      |      |      | 0.6  |
| <i>Hildenbrandia</i> sp.                                                |      |     |      |      |      |      |      |      |      |      |      | 0.3  |
| <i>Mesophyllum</i> sp.                                                  | 1.6  |     | 9.1  | 1.6  | 6.9  | 0.6  | 2.4  |      | 14.6 |      | 1.4  |      |
| <i>Palmophyllum crassum</i> (Naccari)                                   | +    |     | 13.4 |      | 23.1 | 2    | 0.5  |      | 15   |      | 1.2  |      |
| Rabenhorst                                                              |      |     |      |      |      |      |      |      |      |      |      |      |
| <i>Peyssonnelia</i> sp.                                                 | 18.3 |     | 22.3 | 2.9  | 12   | 2.2  | 51.2 |      | 27   | 2.6  | 7.3  |      |
| <i>Valonia macrophysa</i> Kützting                                      |      |     |      |      |      |      | +    |      | +    |      |      |      |
| Turf-forming algae                                                      | 0.4  |     |      |      |      | +    |      |      |      |      | 0.4  |      |
| <b>Foraminifera</b>                                                     |      |     |      |      |      |      |      |      |      |      |      |      |
| <i>Miniacina miniacea</i> (Pallas, 1766)                                | 0.1  | 0.2 | 0.4  | 1.2  | 0.4  | 1.5  | 0.1  | 0.7  | 0.1  | 4.3  |      | 0.9  |
| <b>Porifera</b>                                                         |      |     |      |      |      |      |      |      |      |      |      |      |
| <i>Acanthella acuta</i> Schmidt, 1862                                   |      |     |      |      |      |      |      |      |      |      |      | +    |
| <i>Agelas oroides</i> (Schmidt, 1864)                                   |      |     | 0.4  | 1.1  | 3.8  | 3.4  | 0.4  |      | 4.5  |      | 4.9  | 1.5  |
| <i>Aplysilla sulfurea</i> Schulze, 1878                                 |      |     |      |      |      | 0.1  |      | +    |      |      |      | 1.5  |
| <i>Aplysina</i> sp. *                                                   |      |     |      |      |      |      |      | +    |      |      |      |      |
| <i>Axinella damicornis</i> (Esper, 1794)                                | +    |     | 0.4  | +    | 0.1  | 0.7  | +    | +    | 0.3  |      | 1.2  | 0.7  |
| <i>Chondrosia reniformis</i> Nardo, 1847                                | 0.1  |     | 0.5  |      | 1.1  |      |      | +    |      |      |      | +    |
| <i>Cliona celata</i> Grant, 1826                                        |      | 0.2 |      | +    |      | +    | 0.1  | +    |      |      | +    |      |
| <i>Cliona schmidtii</i> (Ridley, 1881)                                  | +    |     |      | +    |      |      | 0.4  | 0.4  |      |      |      |      |
| <i>Dendroxea lenis</i> (Topsent, 1892)                                  | 0.3  |     | 2.1  | 20.8 | 4    | 12.9 | 1.8  | 14.5 | 0.1  | 9.9  | 1.4  | 25.8 |
| <i>Diplastrella bistellata</i> (Schmidt, 1862)                          |      | 1.5 |      |      |      | 0.4  |      | 0.1  |      |      |      | 0.7  |
| <i>Fasciospongia cavernosa</i> (Schmidt, 1862)                          | 1.4  |     |      | 0.6  | 1.1  |      |      |      | 0.1  |      | 0.4  |      |
| <i>Haliclona</i> ( <i>Reniera</i> ) <i>aquaeductus</i> (Schmidt, 1862)  |      |     |      |      |      | +    | 0.2  | +    |      |      |      |      |
| <i>Haliclona</i> ( <i>Soestella</i> ) <i>mucosa</i> (Griessinger, 1971) |      |     | 0.3  | 1.3  |      | 0.4  | 0.2  | 0.2  | 0.1  |      | 1.2  | 0.5  |
| <i>Hexadella</i> sp.                                                    |      | +   | 0.2  | 0.8  | 0.1  | 0.8  |      | 0.3  |      |      | 0.1  | +    |
| <i>Ircinia oros</i> (Schmidt, 1864)                                     |      |     | 0.5  | 0.1  |      | +    |      |      | +    |      |      |      |
| <i>Ircinia variabilis</i> (Schmidt, 1862)                               |      |     |      |      |      | 0.1  |      |      |      |      | 0.2  |      |
| <i>Merlia normani</i> Kirkpatrick, 1908                                 |      |     | 0.2  | 15.1 | 0.8  | 1.1  | 0.1  | +    |      | 2.5  |      | 1.1  |
| <i>Myrmekioderma spelaeum</i> (Pulitzer-Finali, 1983)                   |      |     |      |      |      |      |      | +    |      |      |      |      |
| <i>Oceanapia</i> sp.                                                    |      |     |      |      |      |      | +    |      |      |      |      |      |
| Orange encrusting sponge                                                | 0.1  | 3.7 | 1.4  | 1.9  | 0.3  | 1.3  | 0.2  | 2.5  |      | 7    | 1.9  | 2.7  |
| <i>Penares euastrum</i> (Schmidt, 1868)                                 |      |     | 1.1  | 3.8  | 1    | 6.6  | 0.1  | 1.1  | 0.5  | 12   | 2.9  | 5.9  |
| <i>Petrobionta massiliana</i> Vacelet & Lévi, 1958 *                    |      |     |      |      |      | +    |      |      |      |      |      | +    |
| <i>Petrosia</i> ( <i>Petrosia</i> ) <i>ficiformis</i> (Poirret, 1789)   |      |     |      | +    |      | +    | 0.1  | +    | +    |      | 0.2  | +    |
| <i>Phorbos topsenti</i> Vacelet & Pérez, 2008                           |      |     |      |      |      |      |      |      |      |      | +    | +    |
| <i>Phorbos tenacior</i> (Topsent, 1925)                                 | 1.6  |     |      |      |      |      |      |      |      | 13.9 | 0.3  |      |
| <i>Plakina</i> sp.                                                      |      |     |      |      |      |      |      | 4.4  |      |      |      | 0.2  |
| Plakinidae                                                              |      | 6.8 |      |      |      |      |      | +    |      |      |      |      |
| <i>Pleraplysilla spinifera</i> (Schulze, 1879)                          |      |     |      |      |      |      |      |      | 0.6  |      | 0.2  |      |
| <i>Prosuberites</i> sp.                                                 |      |     | 0.5  | 1.8  | 0.2  | 0.2  |      |      | 0.2  | 2.1  | 0.9  | 1.8  |
| <i>Sarcotragus</i> sp.                                                  | +    |     | +    |      |      |      |      |      |      |      |      |      |

| Sessile taxa                                                                 | ALO  |      | GIOU |      | OXO  |     | PAL  |      | PANT |      | TROU |      |
|------------------------------------------------------------------------------|------|------|------|------|------|-----|------|------|------|------|------|------|
|                                                                              | CE   | SD   | CE   | SD   | CE   | SD  | CE   | SD   | CE   | SD   | CE   | SD   |
| <i>Spirastrella cunctatrix</i> Schmidt, 1868                                 | 21.6 | 4.7  | 3.1  | 5.6  | 17.6 | 23  | 0.2  | 2.6  | 0.1  | 3.9  | 0.3  | 4.8  |
| <i>Spongosorites</i> sp.                                                     |      |      |      | +    | 0.1  | +   |      | 0.1  | +    |      |      | 0.4  |
| <i>Sycon</i> sp.                                                             |      |      |      |      |      |     | +    |      |      | +    |      | +    |
| <i>Terpios gelatinosus</i> (Bowerbank, 1866)                                 |      |      |      |      |      |     |      |      | 0.2  |      |      | +    |
| <i>Thymosiopsis cuticulatus</i> Vacelet & Pérez, 1998                        |      |      | 0.6  |      | 0.2  | 1.5 |      |      | 0.2  | 3.2  | 0.1  | 1.8  |
| White sponge                                                                 |      |      |      |      |      | 0.1 |      | 0.3  |      |      |      |      |
| Yellow encrusting sponge                                                     | 2.1  |      | 0.4  |      | 0.1  | 0.4 | 0.2  | 0.4  |      | 5.5  | 0.2  | 3.8  |
| <b>Cnidaria</b>                                                              |      |      |      |      |      |     |      |      |      |      |      |      |
| <i>Caryophyllia</i> ( <i>Caryophyllia</i> ) <i>inornata</i> (Duncan, 1878) † | 0.1  | +    |      | +    |      | +   |      | +    | +    | 0.1  |      | +    |
| Hydrozoa spp.                                                                |      |      |      |      | +    | +   |      |      | +    |      |      |      |
| <i>Leptopsammia pruvoti</i> Lacaze-Duthiers, 1897 †                          | +    |      | 0.5  | 0.5  |      | 0.2 |      |      |      | 0.1  | 3.4  | 0.2  |
| <i>Madracis pharensis</i> (Heller, 1868) †                                   |      |      |      | 0.5  |      | 0.8 |      |      | 1.8  |      | 3.1  | 0.4  |
| <i>Parazoanthus axinellae</i> (Schmidt, 1862)                                |      |      |      |      |      |     |      |      |      |      |      | +    |
| <i>Polycyathus muelleriae</i> (Abel, 1959) †                                 |      |      |      | +    |      |     |      |      |      |      |      |      |
| <b>Polychaeta</b>                                                            |      |      |      |      |      |     |      |      |      |      |      |      |
| Serpulidae                                                                   | 5.6  | 10.6 | 0.2  | 0.2  | 0.3  | 3   | 1.4  | 11.1 | 0.3  | 0.4  | 15.7 | 8.3  |
| <b>Mollusca</b>                                                              |      |      |      |      |      |     |      |      |      |      |      |      |
| <i>Neopycnodonte cochlear</i> (Poli, 1795)                                   | 0.3  | 1    |      |      |      |     |      |      |      |      |      |      |
| <i>Lithophaga lithophaga</i> (Linnaeus, 1758) *                              |      |      | +    | +    |      |     |      |      | +    |      |      |      |
| <i>Spondylus</i> sp.                                                         | +    |      |      |      |      |     |      |      |      |      |      |      |
| <b>Crustacea</b>                                                             |      |      |      |      |      |     |      |      |      |      |      |      |
| Cirripedia                                                                   |      |      |      | +    |      |     |      |      |      | 0.2  |      |      |
| <b>Bryozoa</b>                                                               |      |      |      |      |      |     |      |      |      |      |      |      |
| <i>Adeonella</i> sp.                                                         |      |      |      |      |      | +   |      |      |      |      |      |      |
| Bryozoan turf                                                                | 11.6 | 5.2  | 24.6 | 18.3 | 10.8 | 7.8 | 9.2  | 1.2  | 22.3 | 2.8  | 4.4  | 2.2  |
| <i>Bugula</i> sp.                                                            |      | 0.2  |      |      |      |     |      |      |      |      |      |      |
| <i>Caberea boryi</i> (Audouin, 1826)                                         | 0.3  |      | 0.2  |      |      | +   |      | +    | 0.2  |      | 0.2  |      |
| <i>Celleporina</i> sp.                                                       | +    |      |      |      |      |     |      | +    |      |      |      | +    |
| Encrusting Bryozoa                                                           | 6.8  | 7.4  | 2.9  | 2    | 3.8  | 6.7 | 1    | 0.7  | 0.5  | 2.7  | 11.6 | 9.3  |
| <i>Margaretta cereoides</i> (Ellis & Solander, 1786)                         |      |      |      |      |      |     |      |      | 0.4  |      |      |      |
| <i>Myriapora truncata</i> (Pallas, 1766)                                     | +    |      |      |      |      |     |      |      | 0.1  |      |      | +    |
| <i>Patinella radiata</i> (Audouin, 1826)                                     |      |      |      | +    |      |     |      |      | +    | +    | +    | +    |
| <i>Reptadeonella violacea</i> (Johnston, 1847)                               |      |      |      |      |      |     |      |      | 0.1  |      |      |      |
| <i>Reteporella</i> sp.                                                       |      |      |      | 0.1  | 0.1  | 0.9 |      |      | 0.6  | 0.1  |      | 0.3  |
| <i>Schizobrachiella sanguinea</i> (Norman, 1868)                             | 0.5  |      |      |      |      |     |      |      |      |      |      |      |
| <i>Schizomavella</i> sp.                                                     | 0.1  |      | 2.1  | 2.2  | 2.2  | 2.6 |      |      | 1.7  | 0.5  | 1    | 1.1  |
| <b>Brachiopoda</b>                                                           |      |      |      |      |      |     |      |      |      |      |      |      |
| <i>Argyrotheca cuneata</i> (Risso, 1826)                                     |      | +    |      | +    |      |     | +    | +    | +    |      |      | +    |
| <i>Megathiris detruncata</i> (Gmelin, 1791)                                  |      | +    |      | +    |      |     | +    | +    |      |      |      | +    |
| <i>Novocrania</i> sp.                                                        |      | +    |      |      |      |     |      |      |      |      |      |      |
| <b>Ascidacea</b>                                                             |      |      |      |      |      |     |      |      |      |      |      |      |
| <i>Ascidia mentula</i> Müller, 1776                                          |      |      |      | +    |      |     |      |      |      |      |      |      |
| <i>Didemnum</i> sp.1                                                         |      |      |      |      | +    |     |      |      | +    |      |      | +    |
| <i>Didemnum</i> sp.2                                                         | +    | +    |      | +    | +    | +   | +    | +    | +    |      |      | +    |
| <i>Halocynthia papillosa</i> (Linnaeus, 1767)                                | +    |      | 0.1  |      |      | +   |      |      | 0.2  |      |      | +    |
| <i>Pycnoclavella nana</i> (Lahille, 1890)                                    | 0.1  |      |      | +    |      |     | +    | +    | +    |      |      | +    |
| <i>Pyura dura</i> (Heller, 1877)                                             |      |      |      |      |      |     |      |      |      |      | +    | +    |
| <b>Other</b>                                                                 |      |      |      |      |      |     |      |      |      |      |      |      |
| Bare rock                                                                    | 18   | 58   | 0.2  | 0.3  | 2.5  | 12  | 0.2  | 56.3 |      | 17.2 | 11.1 | 5.1  |
| Holes                                                                        | 0.3  |      | 0.3  | 0.2  | 0.3  |     | 0.6  | 0.3  | 0.5  | 0.8  | 1.8  | 0.1  |
| Sediment                                                                     |      |      |      |      |      | 2.5 | 19.2 | 1.7  |      |      | 6.2  | 17.5 |

| Sessile taxa         | ALO |     | GIOU |     | OXO |     | PAL |    | PANT |     | TROU |     |
|----------------------|-----|-----|------|-----|-----|-----|-----|----|------|-----|------|-----|
|                      | CE  | SD  | CE   | SD  | CE  | SD  | CE  | SD | CE   | SD  | CE   | SD  |
| UBS                  | 0.5 | 0.5 | 0.5  | 0.6 | 1.2 | 0.2 | 0.1 |    | 0.2  | 0.5 | 0.4  | 0.4 |
| Total number of taxa | 35  | 18  | 30   | 39  | 28  | 43  | 30  | 36 | 43   | 21  | 34   | 48  |

**Table S2.** Results of one-way ANOSIM for six geomorphological and topographic factors of the studied marine caves.

| Factor               | Global R | p-value |
|----------------------|----------|---------|
| Cave                 | 0.412    | 0.001   |
| Ecological Zone      | 0.467    | 0.001   |
| Cave Type            | 0.238    | 0.001   |
| Entrance Area        | 0.222    | 0.001   |
| Entrance Depth       | 0.317    | 0.001   |
| Entrance Orientation | 0.276    | 0.001   |

**Table S3.** p-values of one-way ANOSIM pairwise tests for the factor 'Cave'.

|               | Alona | Giourious | Oxonisos | Palatia | Panteleimonas | Troulakas |
|---------------|-------|-----------|----------|---------|---------------|-----------|
| Alona         |       |           |          |         |               |           |
| Giourious     | 0.001 |           |          |         |               |           |
| Oxonisos      | 0.001 | 0.001     |          |         |               |           |
| Palatia       | 0.001 | 0.001     | 0.001    |         |               |           |
| Panteleimonas | 0.001 | 0.004     | 0.002    | 0.001   |               |           |
| Troulakas     | 0.001 | 0.001     | 0.001    | 0.001   | 0.001         |           |

**Table S4.** p-values of one-way ANOSIM pairwise tests for the factor 'Entrance Area'.

|                        | 15–40 m <sup>2</sup> | 110–230 m <sup>2</sup> | 630 m <sup>2</sup> |
|------------------------|----------------------|------------------------|--------------------|
| 15–40 m <sup>2</sup>   |                      |                        |                    |
| 110–230 m <sup>2</sup> | 0.001                |                        |                    |
| 630 m <sup>2</sup>     | 0.001                | 0.001                  |                    |

**Table S5.** p-values of one-way ANOSIM pairwise tests for the factor 'Entrance Orientation'.

|       | North | South | East  | West |
|-------|-------|-------|-------|------|
| North |       |       |       |      |
| South | 0.001 |       |       |      |
| East  | 0.001 | 0.001 |       |      |
| West  | 0.042 | 0.001 | 0.001 |      |

**Table S6.** Similarity percentage analysis (SIMPER), showing the contribution of sessile taxa to the average similarity (%) in each ecological zone of the studied caves (CE: entrance zone, SD: semi-dark zone).

| Major taxonomic group | Ecological zone                | CE    | SD    |
|-----------------------|--------------------------------|-------|-------|
|                       | Average Similarity (%)         | 46.01 | 37.16 |
| Sessile taxa          |                                |       |       |
| Macroalgae            | Encrusting Rhodophyta          | 16.52 | 4.24  |
|                       | <i>Mesophyllum</i> sp.         | 6.59  | -     |
|                       | <i>Palmophyllum crassum</i>    | 7.49  | -     |
|                       | <i>Peyssonnelia</i> sp.        | 23.16 | -     |
| Foraminifera          | <i>Miniacina miniacina</i>     | -     | 8.16  |
| Porifera              | <i>Dendroxea lenis</i>         | 3.20  | 16.70 |
|                       | Orange encrusting sponge       | -     | 5.00  |
|                       | <i>Penares euastrum</i>        | -     | 9.21  |
|                       | <i>Spirastrella cunctatrix</i> | 4.15  | 7.94  |
|                       | Yellow encrusting sponge       | -     | 1.98  |

|            |                          |       |       |
|------------|--------------------------|-------|-------|
| Polychaeta | Serpulidae               | 4.28  | 13.09 |
| Bryozoa    | Bryozoan turf            | 18.03 | 12.40 |
|            | Encrusting Bryozoa       | 6.57  | 11.23 |
|            | <i>Schizomavella</i> sp. | 1.79  | 1.46  |

**Table S7.** Similarity percentage analysis (SIMPER), showing the contribution of sessile taxa to the average similarity (%) in the six studied caves (ALO: Alona, GIOU: Giourious, OXO: Oxonisos, PAL: Palatia, PANT: Panteleimonas, TROU: Troulakas).

| Major taxonomic group | Caves                          | ALO   | GIOU  | OXO   | PAL   | PANT  | TROU  |
|-----------------------|--------------------------------|-------|-------|-------|-------|-------|-------|
|                       | Average Similarity (%)         | 44.34 | 52.77 | 50.94 | 42.85 | 35.18 | 47.91 |
|                       | Sessile taxa                   |       |       |       |       |       |       |
| Macroalgae            | Encrusting Rhodophyta          | 4.13  | 17.20 | 5.41  | 10.93 | 14.01 | 5.52  |
|                       | <i>Mesophyllum</i> sp.         | -     | 4.91  | 4.64  | -     | 4.26  | -     |
|                       | <i>Palmophyllum crassum</i>    | -     | 4.41  | 10.11 | -     | 6.54  | -     |
|                       | <i>Peyssonnelia</i> sp.        | -     | 10.29 | 6.70  | 18.26 | 15.95 | 3.30  |
| Foraminifera          | <i>Miniacina miniacina</i>     | -     | 3.89  | 2.86  | 3.55  | 5.71  | -     |
| Porifera              | <i>Agelas oroides</i>          | -     | -     | -     | -     | 1.81  | -     |
|                       | <i>Axinella damicornis</i>     | -     | -     | -     | -     | -     | 2.23  |
|                       | <i>Dendroxea lenis</i>         | -     | 9.45  | 8.29  | 18.94 | -     | 11.45 |
|                       | Orange encrusting sponge       | -     | -     | -     | 2.76  | 2.57  | 5.23  |
|                       | <i>Penares euastrum</i>        | -     | 4.29  | 4.70  | -     | 7.38  | 9.52  |
|                       | <i>Phorbos tenacior</i>        | -     | -     | -     | -     | 2.84  | -     |
|                       | <i>Plakina</i> sp.             | -     | -     | -     | 3.70  | -     | -     |
|                       | Plakinidae                     | 3.44  | -     | -     | -     | -     | -     |
|                       | <i>Prosuberites</i> sp.        | -     | 2.16  | -     | -     | -     | 2.66  |
|                       | <i>Spirastrella cunctatrix</i> | 17.66 | 2.34  | 20.32 | 3.12  | -     | -     |
|                       | Yellow encrusting sponge       | -     | -     | -     | -     | 2.59  | 2.64  |
| Cnidaria              | <i>Leptopsammia pruvoti</i>    | -     | -     | -     | -     | -     | 3.13  |
| Polychaeta            | Serpulidae                     | 28.44 | -     | -     | 13.89 | -     | 19.28 |
| Mollusca              | <i>Neopycnodonte cochlear</i>  | 2.79  | -     | -     | -     | -     | -     |
| Brachiopoda           | <i>Megathiris detruncata</i>   | -     | -     | -     | 4.75  | -     | -     |
| Bryozoa               | Bryozoan turf                  | 21.25 | 22.56 | 14.64 | 8.75  | 20.20 | 4.55  |
|                       | Encrusting Bryozoa             | 14.08 | 5.44  | 9.55  | 3.08  | 3.54  | 18.86 |
|                       | <i>Schizomavella</i> sp.       | -     | 3.83  | 2.97  | -     | 3.90  | 2.16  |

**Table S8.** Similarity percentage analysis (SIMPER), showing the contribution of sessile taxa to the average similarity (%) in each cave type (Semi-sub., semi-submerged; Sub., fully submerged).

| Major taxonomic group | Cave type                      | Semi-sub. | Sub.  |
|-----------------------|--------------------------------|-----------|-------|
|                       | Average Similarity (%)         | 38.30     | 38.02 |
|                       | Sessile taxa                   |           |       |
| Macroalgae            | Encrusting Rhodophyta          | 13.24     | 5.98  |
|                       | <i>Mesophyllum</i> sp.         | 4.06      | -     |
|                       | <i>Palmophyllum crassum</i>    | 5.24      | -     |
|                       | <i>Peyssonnelia</i> sp.        | 13.51     | 2.67  |
| Foraminifera          | <i>Miniacina miniacina</i>     | 4.34      | 1.81  |
| Porifera              | <i>Dendroxea lenis</i>         | 10.28     | 4.01  |
|                       | Orange encrusting sponge       | -         | 3.28  |
|                       | <i>Penares euastrum</i>        | 4.64      | 3.09  |
|                       | <i>Spirastrella cunctatrix</i> | 5.77      | 7.36  |
|                       | Yellow encrusting sponge       | -         | 1.78  |
| Polychaeta            | Serpulidae                     | 3.19      | 27.91 |
|                       | Bryozoan turf                  | 18.29     | 13.07 |
| Bryozoa               | Encrusting Bryozoa             | 6.08      | 19.60 |
|                       | <i>Schizomavella</i> sp.       | 2.39      | -     |

**Table S9.** Similarity percentage analysis (SIMPER), showing the contribution of sessile taxa to the average similarity (%) in each cave entrance area range.

| Major taxonomic group | Entrance area                  | 15–40 m <sup>2</sup> | 110–230 m <sup>2</sup> | 630 m <sup>2</sup> |
|-----------------------|--------------------------------|----------------------|------------------------|--------------------|
|                       | Average Similarity (%)         | 35.44                | 48.94                  | 35.18              |
|                       | Sessile taxa                   |                      |                        |                    |
| Macroalgae            | Encrusting Rhodophyta          | 8.51                 | 10.98                  | 14.01              |
|                       | <i>Mesophyllum</i> sp.         | -                    | 5.14                   | 4.26               |
|                       | <i>Palmophyllum crassum</i>    | -                    | 7.43                   | 6.54               |
|                       | <i>Peyssonnelia</i> sp.        | 6.95                 | 9.04                   | 15.95              |
| Foraminifera          | <i>Miniacina miniacina</i>     | 2.67                 | 3.57                   | 5.71               |
| Porifera              | <i>Agelas oroides</i>          | -                    | -                      | 1.81               |
|                       | <i>Dendroxea lenis</i>         | 8.88                 | 9.51                   | -                  |
|                       | Orange encrusting sponge       | 3.56                 | -                      | 2.57               |
|                       | <i>Penares euastrum</i>        | 2.62                 | 4.78                   | 7.38               |
|                       | <i>Phorbates tenacior</i>      | -                    | -                      | 2.84               |
|                       | <i>Spirastrella cunctatrix</i> | 6.07                 | 9.52                   | -                  |
|                       | Yellow encrusting sponge       | -                    | -                      | 2.59               |
| Polychaeta            | Serpulidae                     | 25.31                | -                      | -                  |
| Bryozoa               | Bryozoan turf                  | 12.87                | 18.87                  | 20.20              |
|                       | Encrusting Bryozoa             | 12.96                | 7.70                   | 3.54               |
|                       | <i>Schizomavella</i> sp.       | -                    | 3.62                   | 3.90               |

**Table S10.** Similarity percentage analysis (SIMPER), showing the contribution of sessile taxa to the average similarity (%) in each entrance depth range.

| Major taxonomic group | Entrance depth                 | 0–10 m | 10–20 m |
|-----------------------|--------------------------------|--------|---------|
|                       | Average Similarity (%)         | 36.24  | 39.87   |
|                       | Sessile taxa                   |        |         |
| Macroalgae            | Encrusting Rhodophyta          | 8.79   | 11.31   |
|                       | <i>Mesophyllum</i> sp.         | -      | 3.61    |
|                       | <i>Palmophyllum crassum</i>    | -      | 5.21    |
|                       | <i>Peyssonnelia</i> sp.        | 9.53   | 9.51    |
| Foraminifera          | <i>Miniacina miniacina</i>     | 3.11   | 3.57    |
| Porifera              | <i>Dendroxea lenis</i>         | 6.16   | 8.83    |
|                       | Orange encrusting sponge       | 2.19   | 2.45    |
|                       | <i>Penares euastrum</i>        | -      | 7.20    |
|                       | <i>Proserius</i> sp.           | -      | 1.85    |
|                       | <i>Spirastrella cunctatrix</i> | 10.03  | 4.77    |
| Polychaeta            | Serpulidae                     | 24.98  | 3.76    |
| Bryozoa               | Bryozoan turf                  | 17.10  | 15.92   |
|                       | Encrusting Bryozoa             | 8.71   | 9.69    |
|                       | <i>Schizomavella</i> sp.       | -      | 3.71    |

**Table S11.** Similarity percentage analysis (SIMPER), showing the contribution of sessile taxa to the average similarity (%) in caves with different entrance orientation.

| Major taxonomic group | Entrance orientation        | East  | West  | North | South |
|-----------------------|-----------------------------|-------|-------|-------|-------|
|                       | Average Similarity (%)      | 38.02 | 41.86 | 50.94 | 42.85 |
|                       | Sessile taxa                |       |       |       |       |
| Macroalgae            | Encrusting Rhodophyta       | 5.98  | 15.95 | 5.41  | 10.93 |
|                       | <i>Mesophyllum</i> sp.      | -     | 4.88  | 4.64  | -     |
|                       | <i>Palmophyllum crassum</i> | -     | 5.71  | 10.11 | -     |
|                       | <i>Peyssonnelia</i> sp.     | 2.67  | 13.21 | 6.70  | 18.26 |
| Foraminifera          | <i>Miniacina miniacina</i>  | 1.81  | 4.51  | 2.86  | 3.55  |
| Porifera              | <i>Dendroxea lenis</i>      | 4.01  | 5.56  | 8.29  | 18.94 |
|                       | Orange encrusting sponge    | 3.28  | 2.11  | -     | 2.76  |
|                       | <i>Penares euastrum</i>     | 3.09  | 5.58  | 4.70  | -     |

|             |                                |       |       |       |       |
|-------------|--------------------------------|-------|-------|-------|-------|
|             | <i>Plakina</i> sp.             | -     | -     | -     | 3.70  |
|             | <i>Prosuberites</i> sp.        | -     | 1.98  | -     | -     |
|             | <i>Spirastrella cunctatrix</i> | 7.36  | -     | 20.32 | 3.12  |
|             | Yellow encrusting sponge       | 1.78  | -     | -     | -     |
| Polychaeta  | Serpulidae                     | 27.91 | -     | -     | 13.89 |
| Brachiopoda | <i>Megathiris detruncata</i>   | -     | -     | -     | 4.75  |
| Bryozoa     | Bryozoan turf                  | 13.07 | 22.28 | 14.64 | 8.75  |
|             | Encrusting Bryozoa             | 19.60 | 4.79  | 9.55  | 3.08  |
|             | <i>Schizomavella</i> sp.       | -     | 4.09  | 2.97  | -     |

**Table S12.** Summary table of the presence of motile species recorded in the caves through visual census (\* NIS species, † Protected species, <sup>A</sup> Associate carnivores, <sup>C</sup> Characteristic carnivores, <sup>DO</sup> Detritus feeders and omnivores, <sup>H</sup> Herbivores). ALO: Alona, GIOU: Giourious, OXO: Oxonisos, PAL: Palatia, PANT: Panteleimonas, TROU: Troulakas.

| Motile taxa                                                             | ALO | GIOU | OXO | PAL | PANT | TROU |
|-------------------------------------------------------------------------|-----|------|-----|-----|------|------|
| <b>Polychaeta</b>                                                       |     |      |     |     |      |      |
| <i>Bonellia viridis</i> Rolando, 1822 <sup>DO</sup>                     |     |      |     | +   |      |      |
| <i>Hermodice carunculata</i> (Pallas, 1766) <sup>DO</sup>               | +   | +    | +   |     | +    | +    |
| <b>Mollusca</b>                                                         |     |      |     |     |      |      |
| <i>Cerithium scabridum</i> Philippi, 1848 * <sup>DO</sup>               |     |      | +   |     |      | +    |
| <i>Umbraculum umbraculum</i> ([Lightfoot], 1786) <sup>A</sup>           |     | +    |     |     |      |      |
| <b>Crustacea</b>                                                        |     |      |     |     |      |      |
| <i>Calcinus tubularis</i> (Linnaeus, 1767) <sup>DO</sup>                |     |      |     |     |      | +    |
| <i>Dromia personata</i> (Linnaeus, 1758) <sup>A</sup>                   | +   |      |     |     |      |      |
| <i>Lysmata seticaudata</i> (Risso, 1816) <sup>C</sup>                   | +   |      |     |     |      |      |
| Mysida                                                                  | +   |      |     |     |      |      |
| <i>Palaemon serratus</i> (Pennant, 1777) <sup>C</sup>                   | +   | +    |     |     |      |      |
| <i>Palinurus elephas</i> (JC Fabricius, 1787) † <sup>A</sup>            |     | +    |     |     |      |      |
| <i>Plesionika narval</i> (JC Fabricius, 1787) <sup>C</sup>              | +   | +    |     | +   |      |      |
| <i>Scyllarides latus</i> (Latreille, 1803) † <sup>A</sup>               | +   |      |     | +   | +    | +    |
| <i>Stenopus spinosus</i> Risso, 1827 in [Risso, 1826-1827] <sup>C</sup> | +   |      |     |     |      |      |
| <i>Urocaridella pulchella</i> Yokes & Galil, 2006 * <sup>DO</sup>       | +   |      |     |     |      |      |
| <b>Echinodermata</b>                                                    |     |      |     |     |      |      |
| <i>Antedon mediterranea</i> (Lamarck, 1816) <sup>DO</sup>               | +   |      |     | +   |      |      |
| <i>Arbacia lixula</i> (Linnaeus, 1758) <sup>H</sup>                     | +   | +    | +   |     |      |      |
| <i>Diadema setosum</i> (Leske, 1778) * <sup>H</sup>                     |     |      |     | +   | +    | +    |
| <i>Holothuria</i> sp. <sup>DO</sup>                                     |     |      | +   |     |      | +    |
| Ophiuridae <sup>DO</sup>                                                | +   |      |     |     |      | +    |
| <i>Paracentrotus lividus</i> (Lamarck, 1816) † <sup>H</sup>             |     | +    |     |     |      |      |
| <b>Pisces</b>                                                           |     |      |     |     |      |      |
| <i>Anthias anthias</i> (Linnaeus, 1758) <sup>A</sup>                    |     |      | +   |     | +    |      |
| <i>Apogon imberbis</i> (Linnaeus, 1758) <sup>C</sup>                    | +   | +    | +   | +   | +    | +    |
| <i>Atherina</i> sp. <sup>A</sup>                                        |     | +    | +   |     | +    | +    |
| <i>Chromis chromis</i> (Linnaeus, 1758) <sup>A</sup>                    | +   | +    | +   |     | +    |      |
| <i>Coris julis</i> (Linnaeus, 1758) <sup>A</sup>                        | +   |      | +   |     | +    | +    |
| <i>Diplodus sargus</i> (Linnaeus, 1758) <sup>A</sup>                    |     |      | +   |     | +    |      |
| <i>Epinephelus marginatus</i> (Lowe, 1834) † <sup>A</sup>               | +   |      |     | +   |      | +    |
| <i>Microlophophrys nigriceps</i> (Vinciguerra, 1883) <sup>A</sup>       |     | +    |     |     |      |      |
| <i>Muraena helena</i> Linnaeus, 1758 <sup>A</sup>                       |     |      |     |     |      | +    |
| <i>Oblada melanura</i> (Linnaeus, 1758) <sup>A</sup>                    |     |      | +   |     | +    |      |
| <i>Parupeneus forsskali</i> (Fourmanoir & Guézé, 1976) * <sup>A</sup>   | +   |      |     |     |      |      |
| <i>Pempheris rhomboidea</i> Kossmann & Räuber, 1877 * <sup>A</sup>      |     |      | +   |     | +    | +    |
| <i>Pterois miles</i> (Bennett, 1828) * <sup>A</sup>                     | +   | +    | +   |     | +    | +    |
| <i>Sargocentron rubrum</i> (Forsskal, 1775) * <sup>A</sup>              | +   |      | +   | +   | +    | +    |
| <i>Scorpaena maderensis</i> Valenciennes, 1833 <sup>C</sup>             | +   | +    | +   |     | +    | +    |
| <i>Scorpaena scrofa</i> Linnaeus, 1758 <sup>A</sup>                     |     |      |     | +   |      |      |

| Motile taxa                                                           | ALO | GIOU | OXO | PAL | PANT | TROU |
|-----------------------------------------------------------------------|-----|------|-----|-----|------|------|
| <i>Serranus cabrilla</i> (Linnaeus, 1758) <sup>A</sup>                | +   |      |     |     | +    | +    |
| <i>Serranus scriba</i> (Linnaeus, 1758) <sup>A</sup>                  |     |      |     |     |      | +    |
| <i>Siganus luridus</i> (Rüppell, 1829) <sup>*H</sup>                  | +   |      | +   |     | +    | +    |
| <i>Siganus rivulatus</i> Forsskål & Niebuhr, 1775 <sup>*H</sup>       |     |      |     |     |      | +    |
| <i>Sparisoma cretense</i> (Linnaeus, 1758) <sup>H</sup>               |     | +    |     |     | +    | +    |
| <i>Thalassoma pavo</i> (Linnaeus, 1758) <sup>A</sup>                  |     | +    | +   |     | +    | +    |
| <i>Torquigener flavimaculosus</i> Hardy & Randall, 1983 <sup>*A</sup> | +   |      |     | +   |      |      |
| <i>Tripterygion melanurum</i> Guichenot, 1850 <sup>A</sup>            | +   | +    | +   |     | +    |      |
| <b>Mammalia</b>                                                       |     |      |     |     |      |      |
| <i>Monachus monachus</i> (Hermann, 1779) <sup>‡A</sup>                | +   |      |     |     |      |      |
| SUM                                                                   | 26  | 16   | 18  | 10  | 19   | 21   |

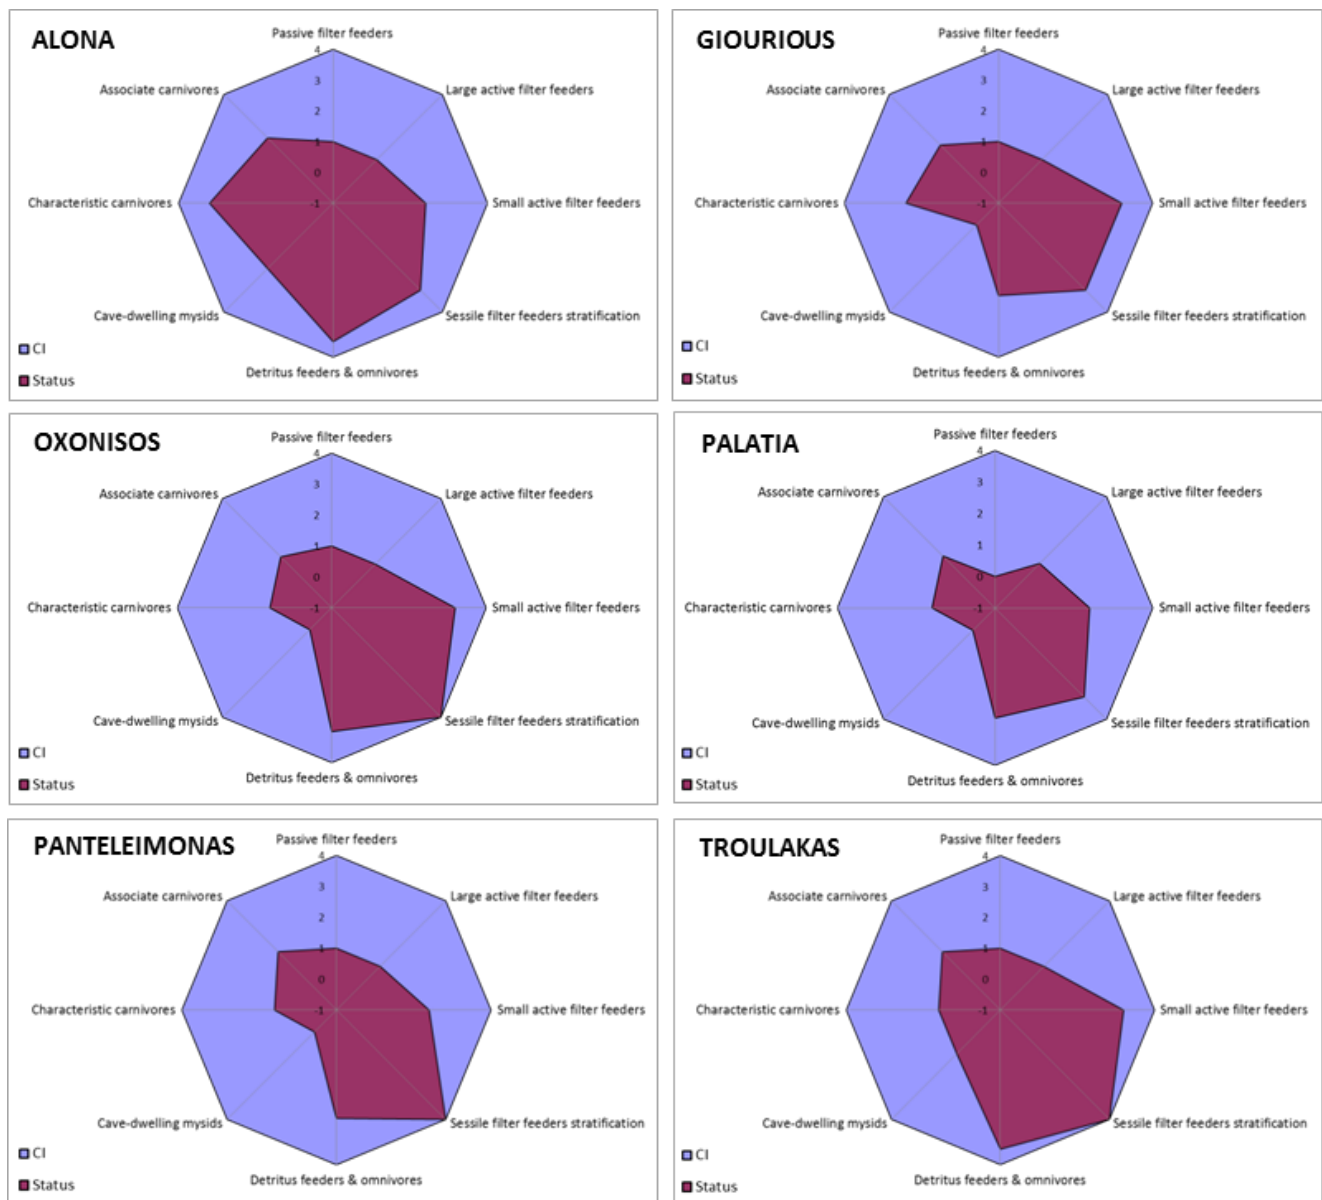

**Figure S1.** Spider-web graphics representing the ecosystem-based ecological quality evaluation of each studied marine cave. CI: Confidence Index. Status scaled from 0 to 10 as follows: Bad  $\leq 2$ , 2 < Poor  $\leq 4$ , 4 < Moderate  $\leq 6$ , 6 < Good  $\leq 8$ , 8 < High.
